# Supplementary material for: Facile preparation of high loading filled PVDF/BaTiO3 piezoelectric composites for selective laser sintering 3D printing
Source: Royal Society of Chemistry journal article supplement (doi:10.1039/d1ra06915b), 2021-01-01
Supplement: d1ra06915b1.pdf [file d1ra06915b1.pdf]

## Supporting Information

### **Facile Preparation of High Loading Filled PVDF/BaTiO<sub>3</sub> Piezoelectric Composites for Selective Laser Sintering 3D Printing**

Shiping Song, Yijun Li, Qi Wang, Chuhong Zhang\*

State Key Laboratory of Polymer Materials Engineering, Polymer Research Institute,

Sichuan University, Chengdu, 610065, China

Email: [chuhong.zhang@scu.edu.cn](mailto:chuhong.zhang@scu.edu.cn)

## 1. The flowability of PVDF and PVDF/BaTiO<sub>3</sub> powder

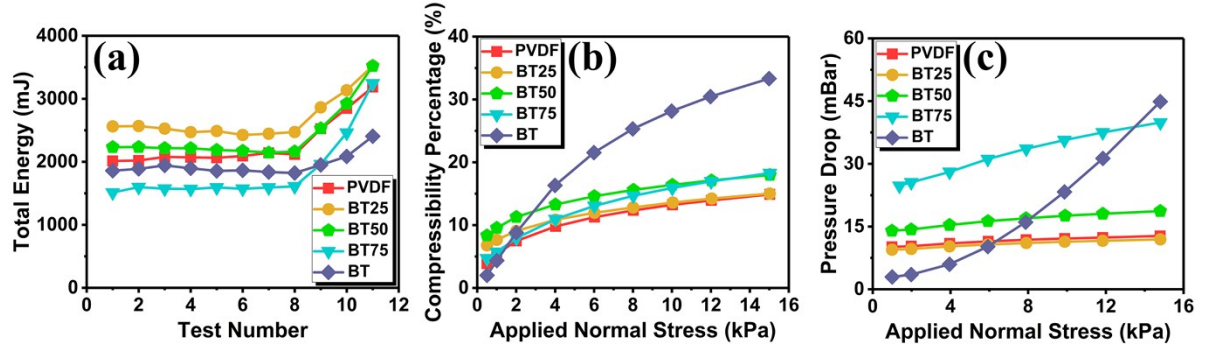

Fig. S1. Flowability test results of PVDF and PVDF/ BaTiO<sub>3</sub> powder: (a) test curves of stability and sensitivity to flow rate; (b) compressibility test curves; (c) permeability test curves.

## 2. The tensile properties of SLS parts

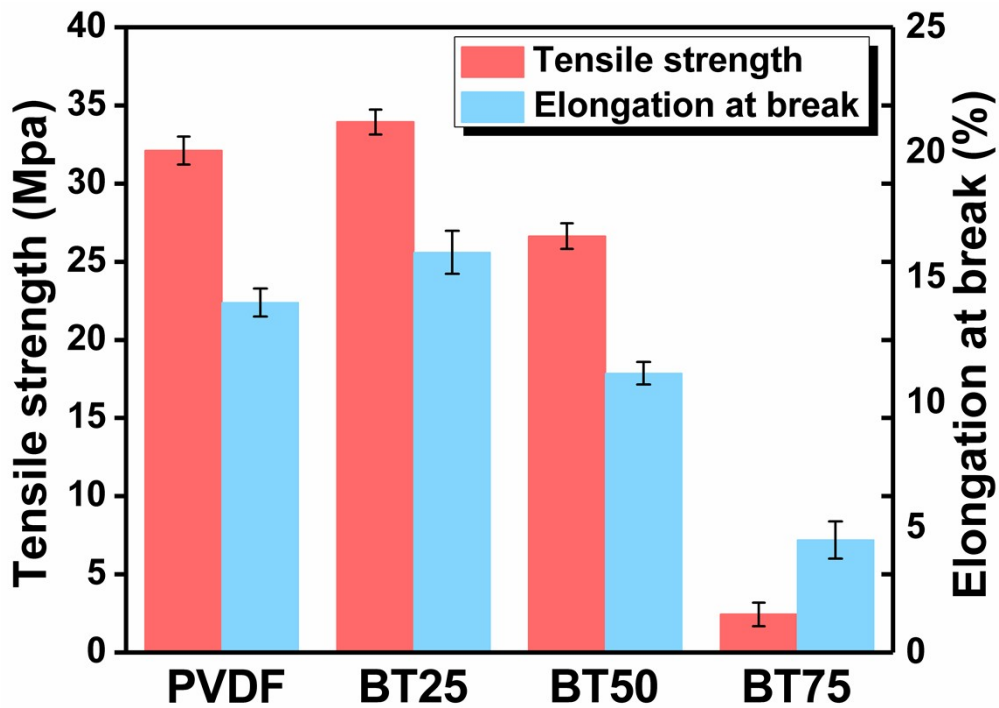

Fig. S2 The tensile strength and elongation at break of SLS parts.

### 3. The crystallization behaviors of the PVDF/BaTiO<sub>3</sub> composite powder

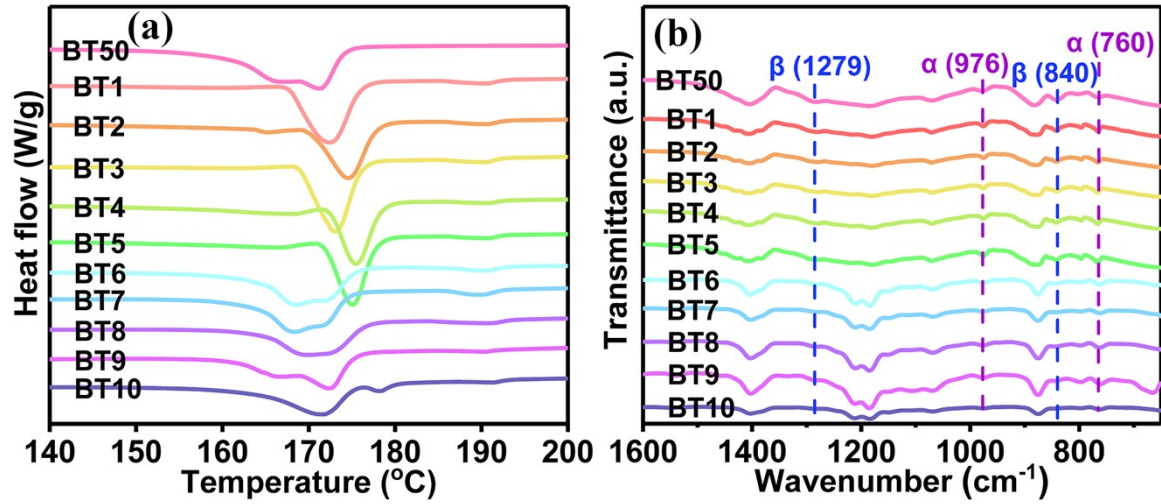

Fig. S3. (a) The DSC curves and (b) FT-IR spectra of PVDF/BaTiO<sub>3</sub> composites with different melting degree.

### 4. The ferroelectric properties of BT50 part

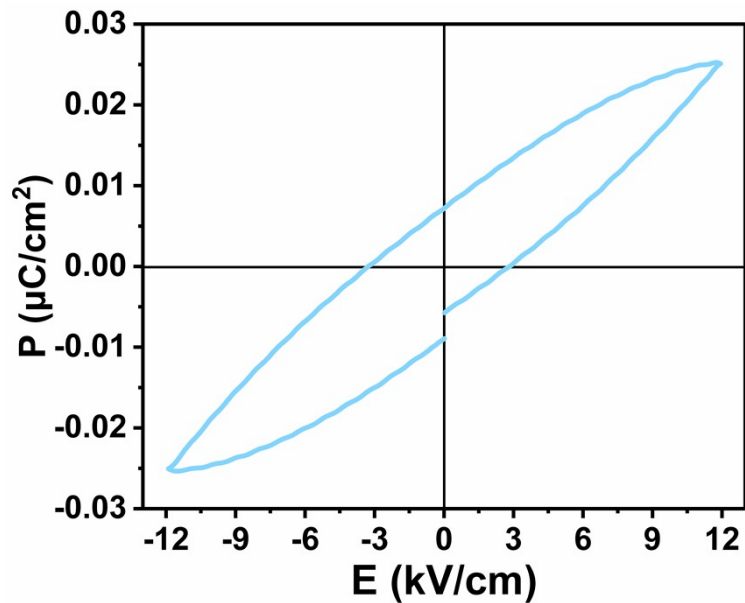

Fig. S4. The P-E hysteresis loop of BT50 part.

## 5. The piezoelectric performance of SLS parts and molded parts

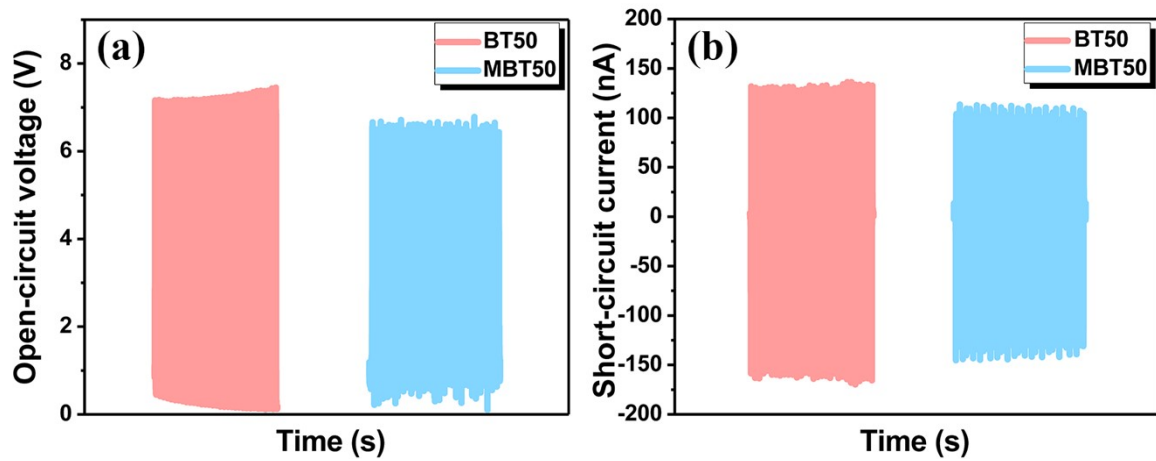

Fig. S5. (a) Open circuit voltage and (b) short circuit current of SLS parts and molded parts.

## 6. The output power of various SLS parts

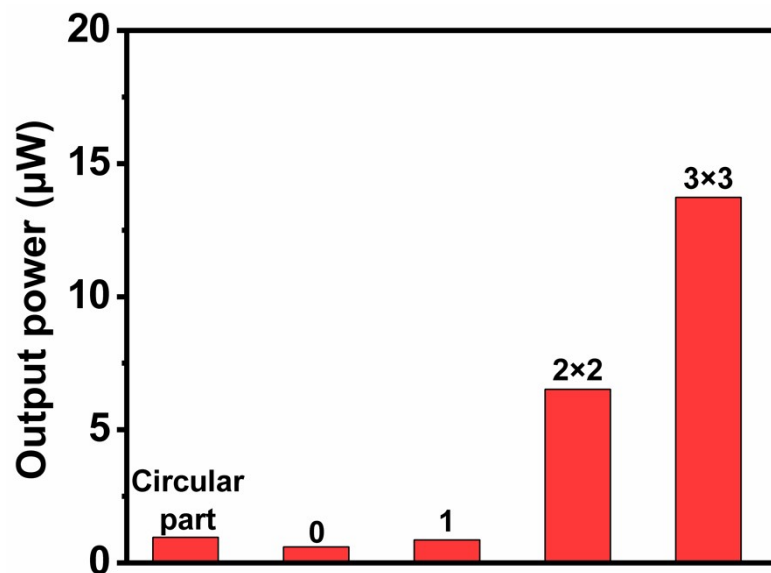

Fig. S6. The output power of various SLS parts as indicated.
